# Supplementary material
Source: Elsevier journal article supplement (https://comptes-rendus.academie-sciences.fr/geoscience/article/10.1016/j.crte.2008.12.005/file/attach/mmc2.pdf)
Supplement: mmc2 [file mmc2.pdf]

Table 2. Laser-MC-ICPMS U-Pb zircon data for paragneiss "Toulon A1" from the Giens peninsula (France), and orthogneiss of Santa Maria (Sardinia, Italy).

Tableau 2. Analyses U-Pb sur zircon Laser-MC-ICPMS pour les paragneiss "Toulon A1" de la presqu'île de Giens (France) de Toulon (France), et des orthogneiss de Santa Maria (Sardaigne, Italie).

| Grain.<br>spot              | U<br>(ppm) | Th<br>(ppm) | Th/U | <sup>206</sup> Pb*<br>(ppm) | <sup>206</sup> Pb/<br><sup>204</sup> Pb | f <sub>206</sub><br>% | Radiogenic ratios                      |        |                                        |       |                                         |         | ρ     | Age (Ma)                               |     |                                        |     |                                         |     | %<br>conc |
|-----------------------------|------------|-------------|------|-----------------------------|-----------------------------------------|-----------------------|----------------------------------------|--------|----------------------------------------|-------|-----------------------------------------|---------|-------|----------------------------------------|-----|----------------------------------------|-----|-----------------------------------------|-----|-----------|
|                             |            |             |      |                             |                                         |                       | <sup>206</sup> Pb/<br><sup>238</sup> U | ±      | <sup>207</sup> Pb/<br><sup>235</sup> U | ±     | <sup>207</sup> Pb/<br><sup>206</sup> Pb | ±       |       | <sup>206</sup> Pb/<br><sup>238</sup> U | ±   | <sup>207</sup> Pb/<br><sup>235</sup> U | ±   | <sup>207</sup> Pb/<br><sup>206</sup> Pb | ±   |           |
|                             |            |             |      |                             |                                         | [2]                   | [1]                                    | [1]    | [1]                                    | [1]   |                                         |         | [1]   | [1]                                    | [1] | [1]                                    | [4] |                                         |     |           |
| <b>07 TOULON 01</b>         |            |             |      |                             |                                         |                       |                                        |        |                                        |       |                                         |         |       |                                        |     |                                        |     |                                         |     |           |
| 1.1                         | 229        | 56          | 0.24 | 70.6                        | 21 189                                  | 0.070                 | 0.3550                                 | 0.0034 | 6.462                                  | 0.074 | 0.13200                                 | 0.00087 | 0.821 | 1959                                   | 16  | 2041                                   | 10  | 2125                                    | 11  | 92        |
| 2.1                         | 121        | 98          | 0.80 | 48.9                        | -                                       | -                     | 0.4679                                 | 0.0059 | 13.666                                 | 0.178 | 0.21185                                 | 0.00071 | 0.966 | 2474                                   | 26  | 2727                                   | 12  | 2920                                    | 5   | 85        |
| 3.1                         | 309        | 139         | 0.45 | 49.1                        | 6 069                                   | 0.275                 | 0.1837                                 | 0.0029 | 2.020                                  | 0.048 | 0.07971                                 | 0.00142 | 0.659 | 1087                                   | 16  | 1122                                   | 16  | 1190                                    | 35  | 91        |
| 4.1                         | 801        | 109         | 0.14 | 62.3                        | 17 054                                  | 0.105                 | 0.0900                                 | 0.0007 | 0.750                                  | 0.010 | 0.06045                                 | 0.00061 | 0.617 | 556                                    | 4   | 568                                    | 6   | 620                                     | 22  | 90        |
| 5.1                         | 84         | 14          | 0.17 | 6.8                         | 898                                     | 1.984                 | 0.0931                                 | 0.0011 | 0.620                                  | 0.113 | 0.04830                                 | 0.00875 | 0.063 | 574                                    | 6   | 490                                    | 68  | 114                                     | 379 | 503       |
| 6.1                         | 76         | 79          | 1.03 | 26.8                        | -                                       | -                     | 0.4100                                 | 0.0060 | 9.237                                  | 0.140 | 0.16342                                 | 0.00061 | 0.969 | 2215                                   | 27  | 2362                                   | 14  | 2491                                    | 6   | 89        |
| 7.1                         | 439        | 303         | 0.69 | 32.5                        | 5 079                                   | 0.353                 | 0.0861                                 | 0.0015 | 0.721                                  | 0.025 | 0.06072                                 | 0.00185 | 0.486 | 533                                    | 9   | 551                                    | 15  | 629                                     | 64  | 85        |
| 8.1                         | 153        | 100         | 0.66 | 18.9                        | 2 975                                   | 0.582                 | 0.1433                                 | 0.0016 | 1.319                                  | 0.059 | 0.06673                                 | 0.00287 | 0.253 | 864                                    | 9   | 854                                    | 25  | 829                                     | 87  | 104       |
| 9.1                         | 51         | 134         | 2.62 | 13.8                        | 12 257                                  | 0.123                 | 0.3186                                 | 0.0047 | 5.241                                  | 0.094 | 0.11930                                 | 0.00123 | 0.819 | 1783                                   | 23  | 1859                                   | 15  | 1946                                    | 18  | 92        |
| 10.1                        | 263        | 140         | 0.53 | 32.1                        | 16 085                                  | 0.108                 | 0.1444                                 | 0.0026 | 1.517                                  | 0.034 | 0.07623                                 | 0.00107 | 0.785 | 869                                    | 14  | 937                                    | 14  | 1101                                    | 28  | 79        |
| 11.1                        | 611        | 95          | 0.15 | 50.0                        | 5 798                                   | 0.307                 | 0.0946                                 | 0.0011 | 0.777                                  | 0.023 | 0.05960                                 | 0.00162 | 0.388 | 582                                    | 6   | 584                                    | 13  | 589                                     | 58  | 99        |
| 12.1                        | 467        | 390         | 0.83 | 35.4                        | 471 036                                 | 0.004                 | 0.0897                                 | 0.0017 | 0.763                                  | 0.015 | 0.06166                                 | 0.00045 | 0.933 | 554                                    | 10  | 576                                    | 9   | 662                                     | 15  | 84        |
| 13.1                        | 287        | 229         | 0.80 | 25.5                        | 2 827                                   | 0.627                 | 0.1046                                 | 0.0010 | 0.827                                  | 0.025 | 0.05732                                 | 0.00164 | 0.325 | 642                                    | 6   | 612                                    | 14  | 504                                     | 62  | 127       |
| 14.1                        | 121        | 33          | 0.27 | 9.9                         | 3 755                                   | 0.474                 | 0.0951                                 | 0.0011 | 0.743                                  | 0.033 | 0.05672                                 | 0.00243 | 0.252 | 585                                    | 6   | 564                                    | 19  | 481                                     | 92  | 122       |
| 15.1                        | 1191       | 431         | 0.36 | 87.1                        | 133 452                                 | 0.013                 | 0.0855                                 | 0.0008 | 0.723                                  | 0.008 | 0.06132                                 | 0.00039 | 0.833 | 529                                    | 5   | 552                                    | 5   | 651                                     | 13  | 81        |
| 16.1                        | 63         | 49          | 0.77 | 8.1                         | 2 423                                   | 0.712                 | 0.1498                                 | 0.0023 | 1.398                                  | 0.075 | 0.06768                                 | 0.00347 | 0.286 | 900                                    | 13  | 888                                    | 31  | 859                                     | 103 | 105       |
| 17.1                        | 169        | 96          | 0.57 | 12.3                        | 7 208                                   | 0.249                 | 0.0849                                 | 0.0008 | 0.692                                  | 0.019 | 0.05913                                 | 0.00150 | 0.360 | 525                                    | 5   | 534                                    | 11  | 572                                     | 54  | 92        |
| 18.1                        | 355        | 257         | 0.73 | 90.5                        | 6 207                                   | 0.250                 | 0.2940                                 | 0.0062 | 4.268                                  | 0.104 | 0.10529                                 | 0.00125 | 0.872 | 1661                                   | 31  | 1687                                   | 20  | 1719                                    | 22  | 97        |
| <b>Santa Maria (ISM 05)</b> |            |             |      |                             |                                         |                       |                                        |        |                                        |       |                                         |         |       |                                        |     |                                        |     |                                         |     |           |
| 13.1                        | 80         | 37          | 0.47 | 31.1                        | 5327                                    | 0.268                 | 0.4491                                 | 0.0071 | 10.462                                 | 0.229 | 0.16896                                 | 0.00254 | 0.724 | 2391                                   | 32  | 2477                                   | 20  | 2547                                    | 25  | 94        |

- Notes :
- [1] Uncertainties given at one  $\sigma$  level.
  - [2] f<sub>206</sub> % denotes the percentage de <sup>206</sup>Pb that is common Pb
  - [3] Correction for common Pb made using the measured <sup>206</sup>Pb/<sup>204</sup>Pb ratio
  - [4] For % Conc., 100% denotes a concordant analysis.
